# Supplementary material
Source: publisher figshare collection journal article supplement (https://tandf.figshare.com/ndownloader/files/24426102)
Supplement: Supplementary file 1 [file 24426102]

**Supplementary Figures**


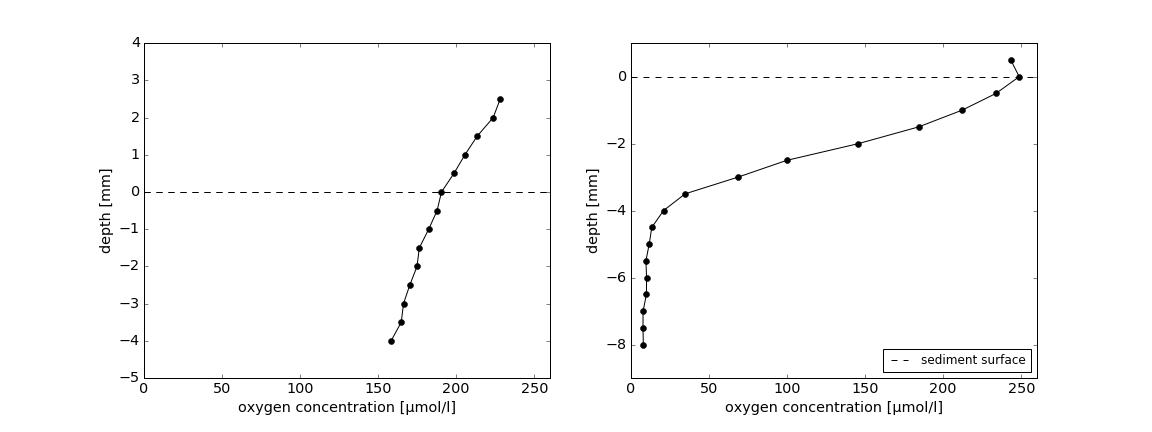


Figure S1: Oxygen profiles in additional examples of ‘classic’ and ‘partly drained and accumulated’ cryoconite debris from camp Black and Bloom (see main text for definitions)


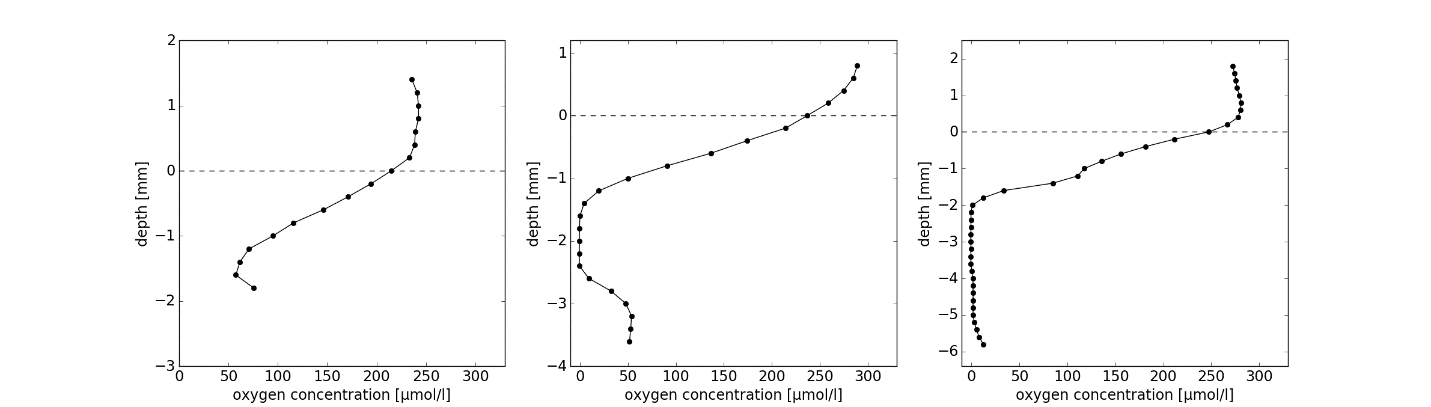


Figure S2: Oxygen profile measured using a microsensor within spherical cryoconite granules.


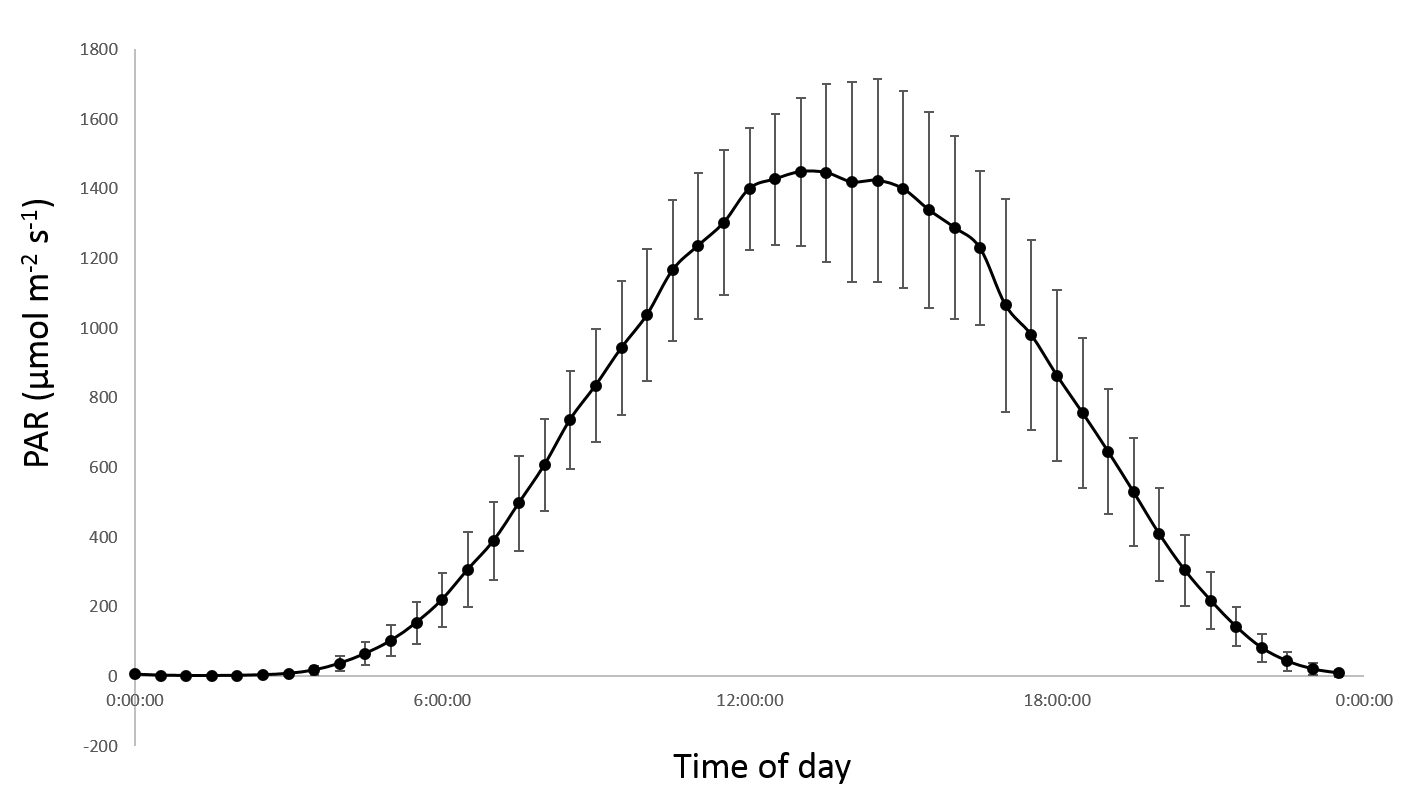


Figure S3: Typical mean PAR receipt at Camp Black and Bloom over 24 hr in July 2016.
